# Supplementary material for: Influence of Magnetic Field with Schumann Resonance Frequencies on Photosynthetic Light Reactions in Wheat and Pea
Source: MDPI journal article supplement (doi:10.3390/cells10010149), 2021-01-13
Supplement: s1 [file s1]

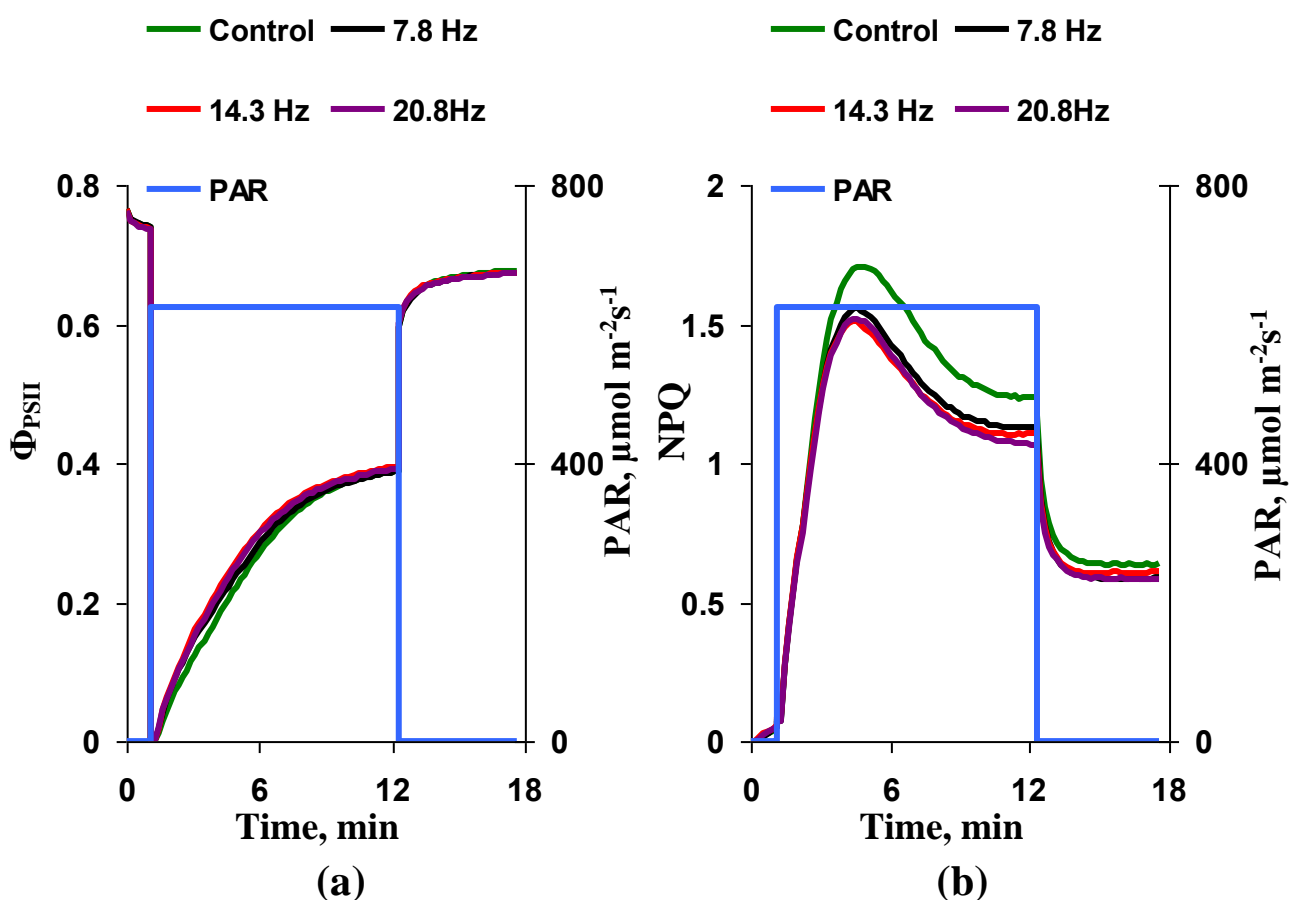

**Figure S1.** Average dynamics of changes in quantum yield of photosystem II ( $\Phi_{PSII}$ ) **(a)** and non-photochemical quenching (NPQ) **(b)** under action of actinic light (its intensity is marked as PAR) in wheat seedlings under short-term action of ELFMFs with different frequencies ( $n=30$ ). Standard errors were not shown. Illumination was initiated after 15 min of dark adaptation. Action of the artificial magnetic field was immediately initiated before initiation of dark adaptation; total duration of its action was 30 min. Photosynthetic parameters were measured under the action of this field. Magnitude of magnetic fields was 18  $\mu\text{T}$ ; control plants were not treated by this artificial magnetic field.
